# Supplementary material for: STING-associated vasculopathy develops independently of IRF3 in mice
Source: PubMed Central journal article supplement — J Exp Med. 2017 Nov 6;214(11):3279–92. doi: 10.1084/jem.20171351 (PMC5679177; doi:10.1084/jem.20171351), 2017-11-06
Supplement: JEM_20171351_sm.pdf [file JEM_20171351_sm.pdf]

## SUPPLEMENTAL MATERIAL

Warner et al., <https://doi.org/10.1084/jem.20171351>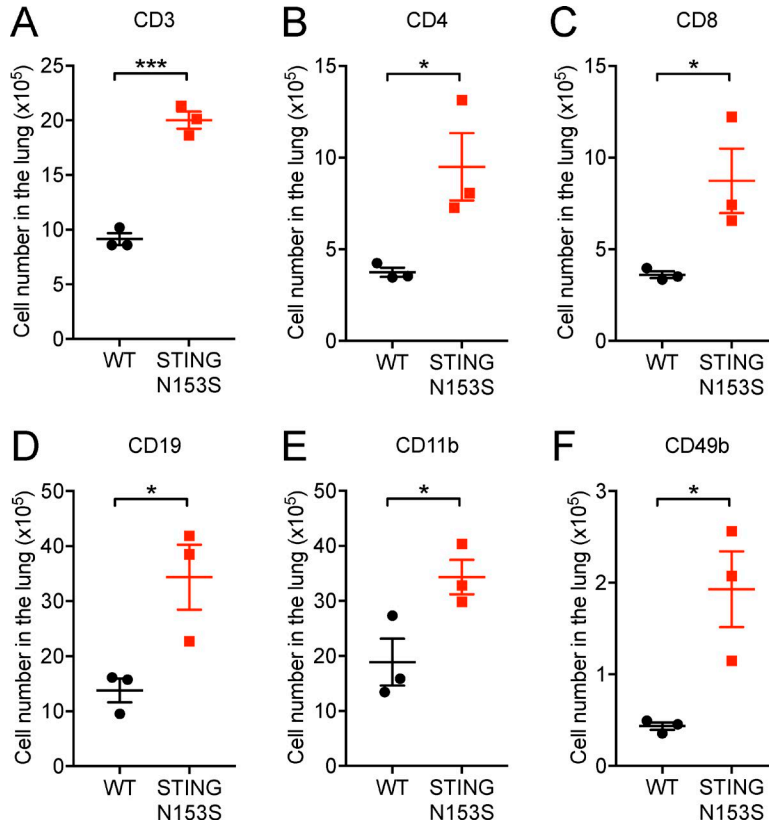

Figure S1. **Pulmonary immune cell analysis of WT and STING N153S mice.** (A–F) Flow cytometry analysis of immune cells isolated from the lungs of WT and STING N153S mice. Total numbers were determined for the following immune cell subsets: CD3<sup>+</sup> (A), CD4<sup>+</sup> (B), CD8<sup>+</sup> (C), CD19<sup>+</sup> (D), CD11b<sup>+</sup> (E), and CD49b<sup>+</sup> populations (F). Data represent the mean  $\pm$  SEM of  $n = 3$  mice per group. \*,  $P < 0.05$ , \*\*\*,  $P < 0.0005$  by unpaired  $t$  test.

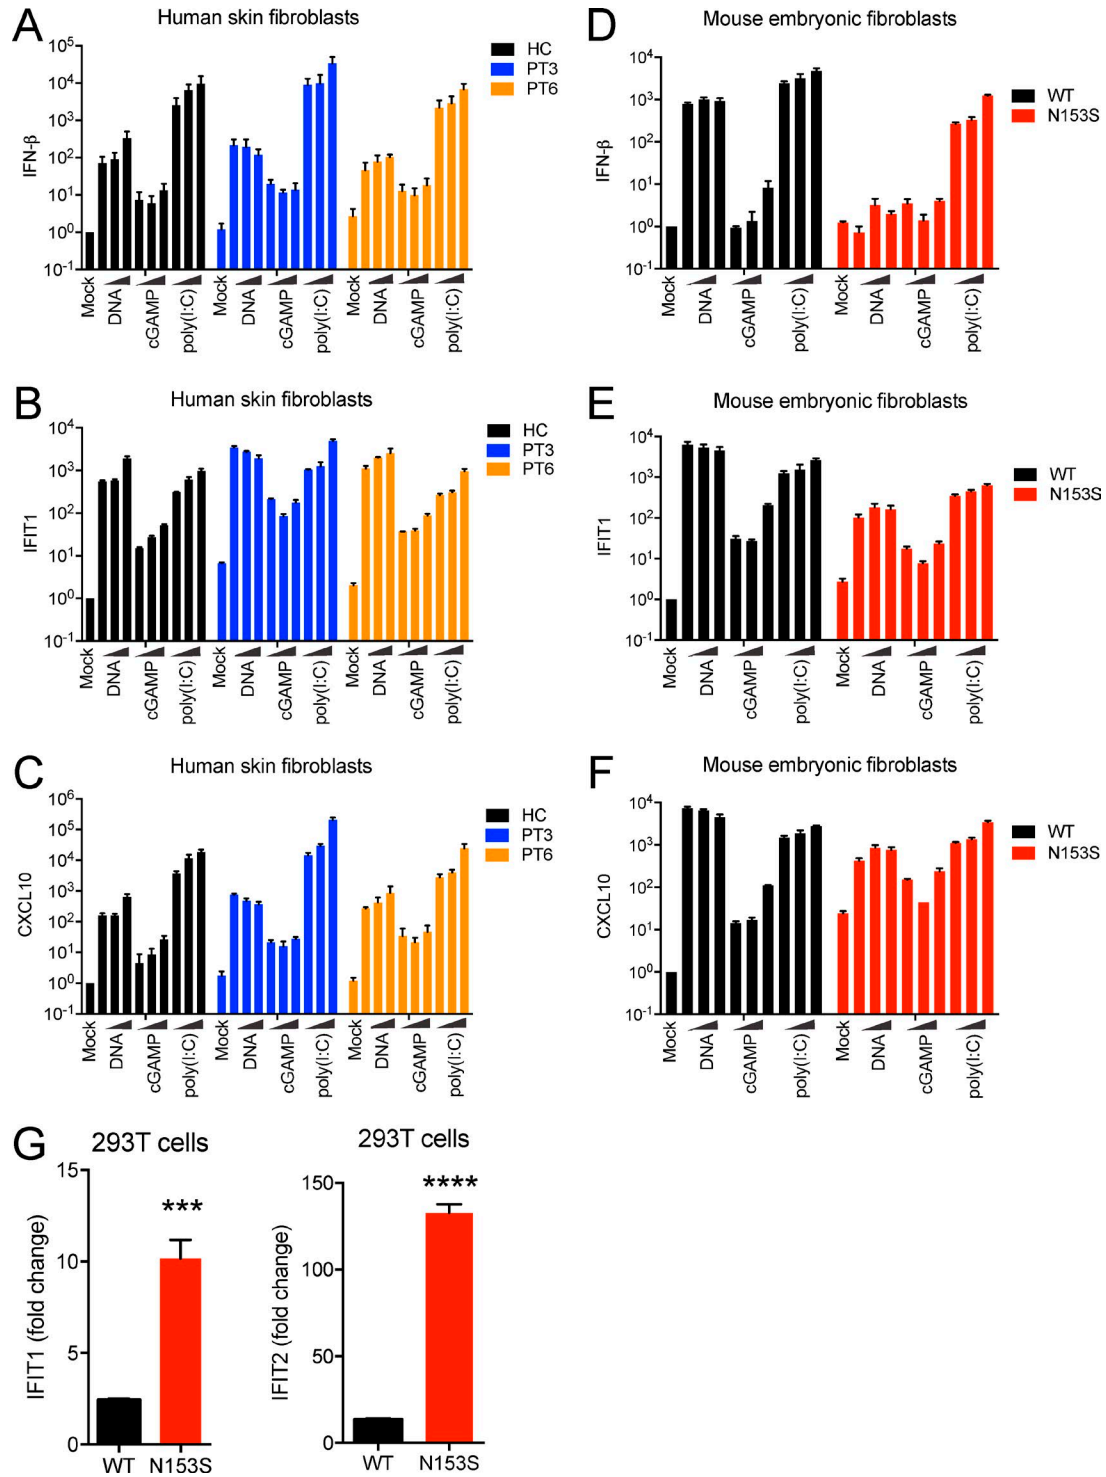

Figure S2. **IFN- $\beta$  and ISG expression in primary STING N154S patient skin fibroblasts, STING N153S MEFs, and transfected 293T cells.** (A–F) Cells were stimulated with increasing amounts of 2'3'-cGAMP (2, 4, and 8  $\mu$ g), herring testes DNA (htDNA; 0.1, 0.5, and 1  $\mu$ g) and polyinosinic-polycytidylic acid (poly I:C; 0.1, 0.5, and 1  $\mu$ g) for 6 h. There was no significant difference cGAMP-transfected WT and STING N153S MEFs or between healthy control and STING N154S skin fibroblasts. Data were analyzed by ANOVA. (G) ISG expression in 293T cells 24 h after overexpression of WT mouse or mutant STING N153S as previously described (Dobbs et al., 2015). \*\*\*,  $P < 0.0005$ ; \*\*\*\*,  $P < 0.0001$  by  $t$  test. Stimulations were performed in biological triplicates, and qRT-PCR was performed in technical triplicates. Data represent the mean  $\pm$  SEM.

Table S1. Antibodies used in CyTOF

| Tag   | Target              | Clone       | Manufacturer | Catalog # |
|-------|---------------------|-------------|--------------|-----------|
| 089Y  | CD45                | 30-F11      | Fluidigm     | 3089005B  |
| 141Pr | pSHP2               | D66F10      | Fluidigm     | 3141002A  |
| 142Nd | Caspase 3 (Cleaved) | D3E9        | Fluidigm     | 3142004A  |
| 143Nd | TCRβ                | H57-597     | Fluidigm     | 3143010B  |
| 145Nd | CD4                 | RM4-5       | Fluidigm     | 3145002B  |
| 146Nd | CD8α                | 53-6.7      | Fluidigm     | 3146003B  |
| 147Sm | pSTAT5              | 47          | Fluidigm     | 3147012A  |
| 148Nd | CD11B (Mac-1)       | M1/70       | Fluidigm     | 3148003B  |
| 149Sm | p4E-BP1             | 236B4       | Fluidigm     | 3149005A  |
| 150Nd | CD25                | 3C7         | Fluidigm     | 3150002B  |
| 151Eu | Ly-6G               | 1A8         | Fluidigm     | 3151010B  |
| 153Eu | pSTAT1              | 58D6        | Fluidigm     | 3153003A  |
| 154Sm | TER119              | TER-119     | Fluidigm     | 3154005B  |
| 155Gd | pTBK1/NAK           | D52C2       | CST          | 5483BF    |
| 158Gd | pSTAT3              | 4/P-Stat3   | Fluidigm     | 3158005A  |
| 159Tb | TCRγδ               | GL3         | Fluidigm     | 3159012B  |
| 160Gd | CD45R (B220)        | RA3-6B2     | Fluidigm     | 3160012B  |
| 161Dy | pBAD                | 40A9        | Fluidigm     | 3161006A  |
| 164Dy | IκBα                | L35A5       | Fluidigm     | 3164004A  |
| 165Ho | CD3e                | 145-2C11    | Fluidigm     | 3165020B  |
| 166Er | CD19                | 6D5         | Fluidigm     | 3166015B  |
| 168Er | Ki67                | B56         | Fluidigm     | 3168007B  |
| 170Er | NK1.1               | PK136       | Fluidigm     | 3170002B  |
| 171Yb | CD44                | IM7         | Fluidigm     | 3171003B  |
| 172Yb | pS6                 | N7-548      | Fluidigm     | 3172008A  |
| 173Yb | CD117 (c-kit)       | 2B8         | Fluidigm     | 3173004B  |
| 174Yb | MHCII               | M5/114.15.2 | Fluidigm     | 3174003B  |
| 176Yb | pCREB               | 87G3        | Fluidigm     | 3176005A  |

Table S2. Definition of populations used in CyTOF analysis

| Cell populations                                            | Marker expression                                                                                                                                                     |
|-------------------------------------------------------------|-----------------------------------------------------------------------------------------------------------------------------------------------------------------------|
| <b>Fig. 5</b>                                               |                                                                                                                                                                       |
| CD4 (CD4 T cells)                                           | CD45 <sup>+</sup> TER119 <sup>-</sup> CD3 <sup>+</sup> CD4 <sup>+</sup> TCRβ <sup>+</sup>                                                                             |
| CD8 (CD8 T cells)                                           | CD45 <sup>+</sup> TER119 <sup>-</sup> CD3 <sup>+</sup> CD8 <sup>+</sup> TCRβ <sup>+</sup>                                                                             |
| NK (NK cells)                                               | CD45 <sup>+</sup> TER119 <sup>-</sup> NK1.1 <sup>+</sup> CD3 <sup>-</sup>                                                                                             |
| CD19 (B cells)                                              | CD45 <sup>+</sup> TER119 <sup>-</sup> CD19 <sup>+</sup> B220 <sup>+</sup> MHCII <sup>int/lo</sup>                                                                     |
| Ly6G <sup>+</sup> (CD11b <sup>hi</sup> Ly6G <sup>hi</sup> ) | CD45 <sup>+/lo</sup> TER119 <sup>-</sup> CD11b <sup>hi</sup> Ly6G <sup>hi</sup>                                                                                       |
| Monocytes                                                   | CD45 <sup>+</sup> TER119 <sup>-</sup> CD11b <sup>+</sup> Ly6G <sup>-</sup> MHCII <sup>-</sup>                                                                         |
| Immature myeloid                                            | CD45 <sup>lo</sup> TER119 <sup>-</sup> CD117 <sup>+/lo</sup> CD11b <sup>+</sup> Ly6G <sup>int/lo</sup>                                                                |
| CD3 double-negative (DN)                                    | CD45 <sup>+</sup> TER119 <sup>-</sup> CD3 <sup>+</sup> CD4 <sup>-</sup> CD8 <sup>-</sup>                                                                              |
| <b>Fig. 6</b>                                               |                                                                                                                                                                       |
| CD4 <sup>+</sup> CD8 <sup>-</sup>                           | CD45 <sup>+</sup> TER119 <sup>-</sup> B220 <sup>-</sup> CD19 <sup>-</sup> NK1.1 <sup>-</sup> CD4 <sup>+</sup> CD8 <sup>-</sup>                                        |
| CD8 <sup>+</sup> CD4 <sup>-</sup>                           | CD45 <sup>+</sup> TER119 <sup>-</sup> B220 <sup>-</sup> CD19 <sup>-</sup> NK1.1 <sup>-</sup> CD8 <sup>+</sup> CD4 <sup>-</sup>                                        |
| CD4 <sup>+</sup> CD8 <sup>+</sup>                           | CD45 <sup>+</sup> TER119 <sup>-</sup> B220 <sup>-</sup> CD19 <sup>-</sup> NK1.1 <sup>-</sup> CD4 <sup>+</sup> CD8 <sup>+</sup>                                        |
| CD4 <sup>-</sup> CD8 <sup>-</sup>                           | CD45 <sup>+</sup> TER119 <sup>-</sup> B220 <sup>-</sup> CD19 <sup>-</sup> NK1.1 <sup>-</sup> CD4 <sup>-</sup> CD8 <sup>-</sup>                                        |
| CD19 <sup>+</sup> B220 <sup>+</sup>                         | CD45 <sup>+</sup> TER119 <sup>-</sup> B220 <sup>+</sup> CD19 <sup>+</sup>                                                                                             |
| NK1.1 <sup>+</sup>                                          | CD45 <sup>+</sup> TER119 <sup>-</sup> B220 <sup>-</sup> CD19 <sup>-</sup> NK1.1 <sup>+</sup>                                                                          |
| DN1                                                         | CD45 <sup>+</sup> TER119 <sup>-</sup> B220 <sup>-</sup> CD19 <sup>-</sup> NK1.1 <sup>-</sup> CD4 <sup>+</sup> CD8 <sup>+</sup> CD44 <sup>+</sup> CD25 <sup>-</sup>    |
| DN2                                                         | CD45 <sup>+</sup> TER119 <sup>-</sup> B220 <sup>-</sup> CD19 <sup>-</sup> NK1.1 <sup>-</sup> CD4 <sup>+</sup> CD8 <sup>+</sup> CD44 <sup>+</sup> CD25 <sup>+</sup>    |
| DN3                                                         | CD45 <sup>+</sup> TER119 <sup>-</sup> B220 <sup>-</sup> CD19 <sup>-</sup> NK1.1 <sup>-</sup> CD4 <sup>+</sup> CD8 <sup>+</sup> CD25 <sup>+</sup> CD44 <sup>lo/-</sup> |
| DN4                                                         | CD45 <sup>+</sup> TER119 <sup>-</sup> B220 <sup>-</sup> CD19 <sup>-</sup> NK1.1 <sup>-</sup> CD4 <sup>+</sup> CD8 <sup>+</sup> CD44 <sup>lo/-</sup> CD25 <sup>-</sup> |
| <b>Fig. 7</b>                                               |                                                                                                                                                                       |
| B cells                                                     | CD45 <sup>+</sup> TER119 <sup>-</sup> CD3 <sup>-</sup> CD19 <sup>+</sup>                                                                                              |
| T cells                                                     | CD45 <sup>+</sup> TER119 <sup>-</sup> CD19 <sup>-</sup> CD3 <sup>+</sup>                                                                                              |
| Monocytes                                                   | CD45 <sup>+</sup> TER119 <sup>-</sup> CD3 <sup>-</sup> CD19 <sup>-</sup> CD11b <sup>+</sup> Ly6G <sup>-</sup> MHCII <sup>-</sup>                                      |
| NK cells                                                    | CD45 <sup>+</sup> TER119 <sup>-</sup> CD19 <sup>-</sup> CD3 <sup>-</sup> NK1.1 <sup>+</sup>                                                                           |
| Immature myeloid                                            | CD45 <sup>+</sup> TER119 <sup>-</sup> CD3 <sup>-</sup> CD19 <sup>-</sup> CD11b <sup>+</sup> MHCII <sup>-</sup>                                                        |

## REFERENCE

Dobbs, N., N. Burnaevskiy, D. Chen, V.K. Gonugunta, N.M. Alto, and N. Yan. 2015. STING activation by translocation from the ER is associated with infection and autoinflammatory disease. *Cell Host Microbe*. 18:157–168. <http://dx.doi.org/10.1016/j.chom.2015.07.001>
